# Supplementary material
Source: publisher figshare collection journal article supplement (https://springernature.figshare.com/ndownloader/files/15588131)
Supplement: Supplementary file [file 15588131]

<sup>1</sup>Additional file 13 — Tables S9 and S10, and Figure S5

<sup>2</sup>Incremental cost-effectiveness ratios.

An alternative to calculating the threshold dose price is to set the vaccine dose price to a fixed value, and then

<sup>3</sup>calculate the incremental cost of each additional QALY for a given vaccination strategy (the incremental

<sup>4</sup>cost-effectiveness ratio). These are presented for a range of dose prices (covering the list price for the quadrivalent vaccine of £87.50 per dose), using each of the three vaccines, and vaccinating either girls only or girls and boys.

<sup>5</sup>The results are shown in Tables S9 and S10, and Fig S5.

| Strategy                   | £0                | £20               | £40               | £60               | £80   | £100   |
|----------------------------|-------------------|-------------------|-------------------|-------------------|-------|--------|
| Girls, bivalent            | strategy dominant | strategy dominant | 1943              | 15930             | 29916 | 43903  |
| Girls, quadrivalent        | strategy dominant | strategy dominant | strategy dominant | 1364              | 8877  | 16390  |
| Girls, nonavalent          | strategy dominant | strategy dominant | strategy dominant | strategy dominant | 6655  | 13668  |
| Girls & boys, bivalent     | strategy dominant | 109               | 26499             | 52890             | 79280 | 105671 |
| Girls & boys, quadrivalent | strategy dominant | strategy dominant | 7007              | 21152             | 35297 | 49442  |
| Girls & boys, nonavalent   | strategy dominant | strategy dominant | 4997              | 18195             | 31394 | 44592  |

**Table S9** Incremental cost-effectiveness ratios for alternative vaccination strategies at alternative assumed vaccine dose prices (minus the £10 administration fee assumed in the analysis - hence the first column represents paying the administration fee plus zero for each vaccine dose). Evaluated strategies are relative to halted vaccination. Note that "strategy dominant" means that the vaccination strategy is on average both cheaper and more effective.

| Strategy                   | £0                | £20    | £40    | £60    | £80    | £100    |
|----------------------------|-------------------|--------|--------|--------|--------|---------|
| Girls & boys, bivalent     | strategy dominant | 204344 | 439225 | 674106 | 908987 | 1143868 |
| Girls & boys, quadrivalent | strategy dominant | 98425  | 219913 | 341401 | 462889 | 584377  |
| Girls & boys, nonavalent   | strategy dominant | 91142  | 203735 | 316327 | 428920 | 541513  |

**Table S10** Incremental cost-effectiveness ratios for alternative vaccination strategies at alternative assumed vaccine dose prices (minus the £10 administration fee assumed in the analysis). Evaluated strategies are relative to vaccinating girls only.

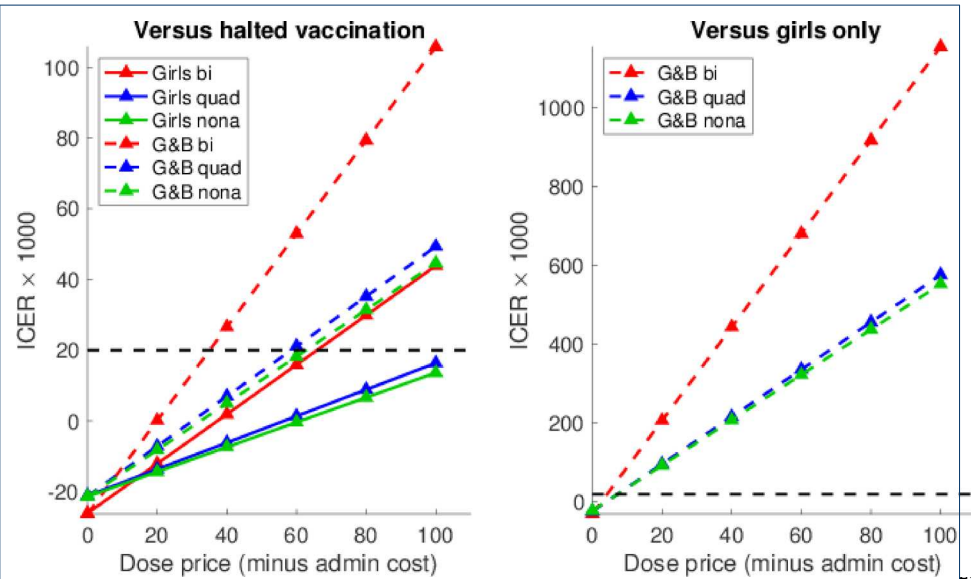

**Figure S5** The incremental cost-effectiveness ratios, for all three vaccines, at a range of dose prices. Values for girls-only vaccination are shown by solid lines, gender-neutral by dashed lines. Vaccines are colour coded: red (bivalent), blue (quadrivalent), green (nonavalent). £20,000 threshold shown by horizontal dashed black line. Left plot: compared to halted vaccination. Right plot: compared to girls-only vaccination.
